# Supplementary material for: The Impact of NOTCH Pathway Alteration on Tumor Microenvironment and Clinical Survival of Immune Checkpoint Inhibitors in NSCLC
Source: PubMed Central journal article supplement (PMC8302260; doi:10.3389/fimmu.2021.638763), 2021-07-09

**A**

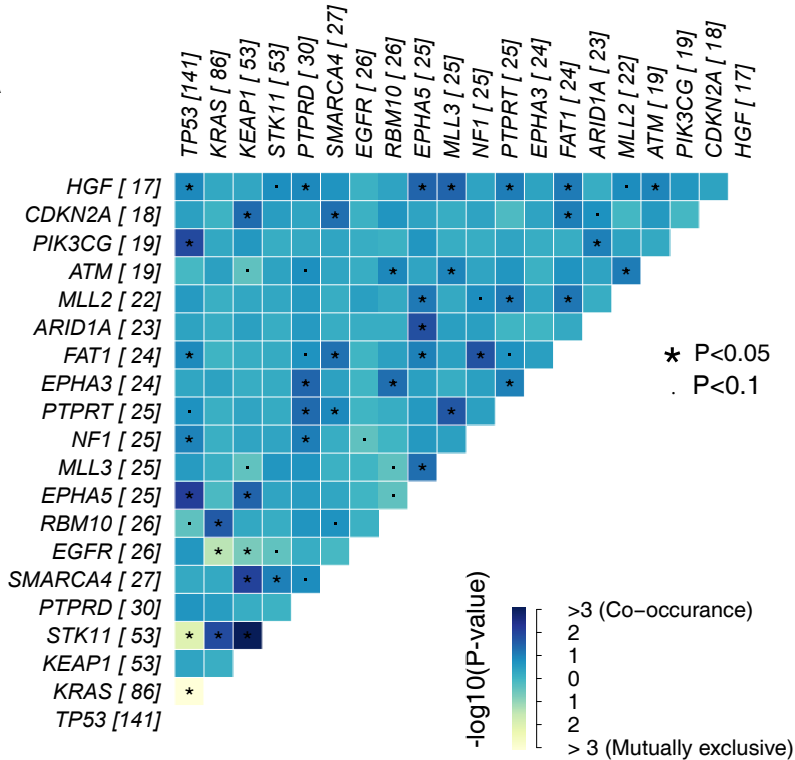

**B**

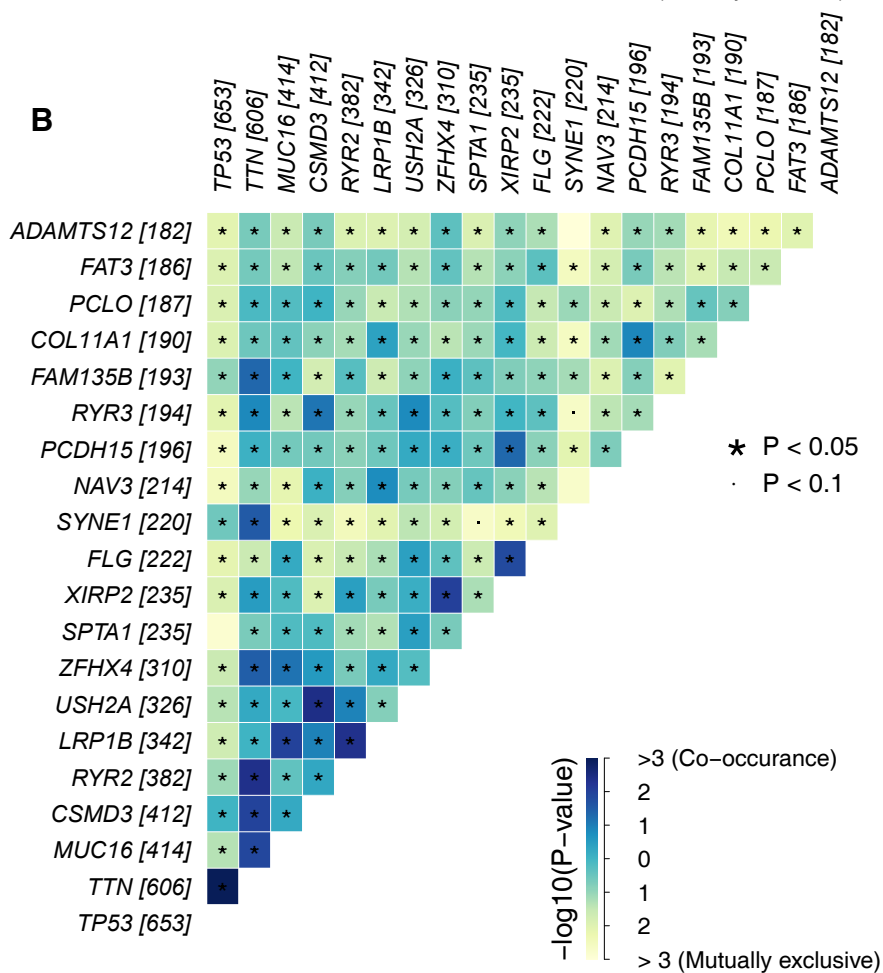

Supplement: Image_2.pdf [file Image_2.pdf]
